# Supplementary material for: Design and Synthesis of Cobalt-Based Hollow Nanoparticles through the Liquid Metal Template
Source: MDPI journal article supplement (doi:10.3390/mi13081292), 2022-08-11
Supplement: s1 [file s1]

# **Design and Synthesis of Cobalt-Based Hollow Nanoparticles through the Liquid Metal Template**

**Yuan Ji <sup>1</sup>, Zhenlong Li <sup>2,\*</sup>, Yundan Liu <sup>3</sup>, Xianghua Wu <sup>1</sup> and Long Ren <sup>1,\*</sup>**

<sup>1</sup> State Key Laboratory of Advanced Technology for Materials Synthesis and Processing, International School of Materials Science and Engineering, Wuhan University of Technology, Wuhan 430070, China

<sup>2</sup> School of Basic Medical Sciences, Zhuhai Campus of Zunyi Medical University, Zhuhai 519041, China

<sup>3</sup> Hunan Key Laboratory of Micro-Nano Energy Materials and Devices, Laboratory for Quantum Engineering and Micro-Nano Energy Technology, and Faculty of Materials and Optoelectronic Physics, Xiangtan University, Xiangtan 411105, China

\* Correspondence: zlli@zmu.edu.cn (Z.L.); renlong@whut.edu.cn (L.R.)

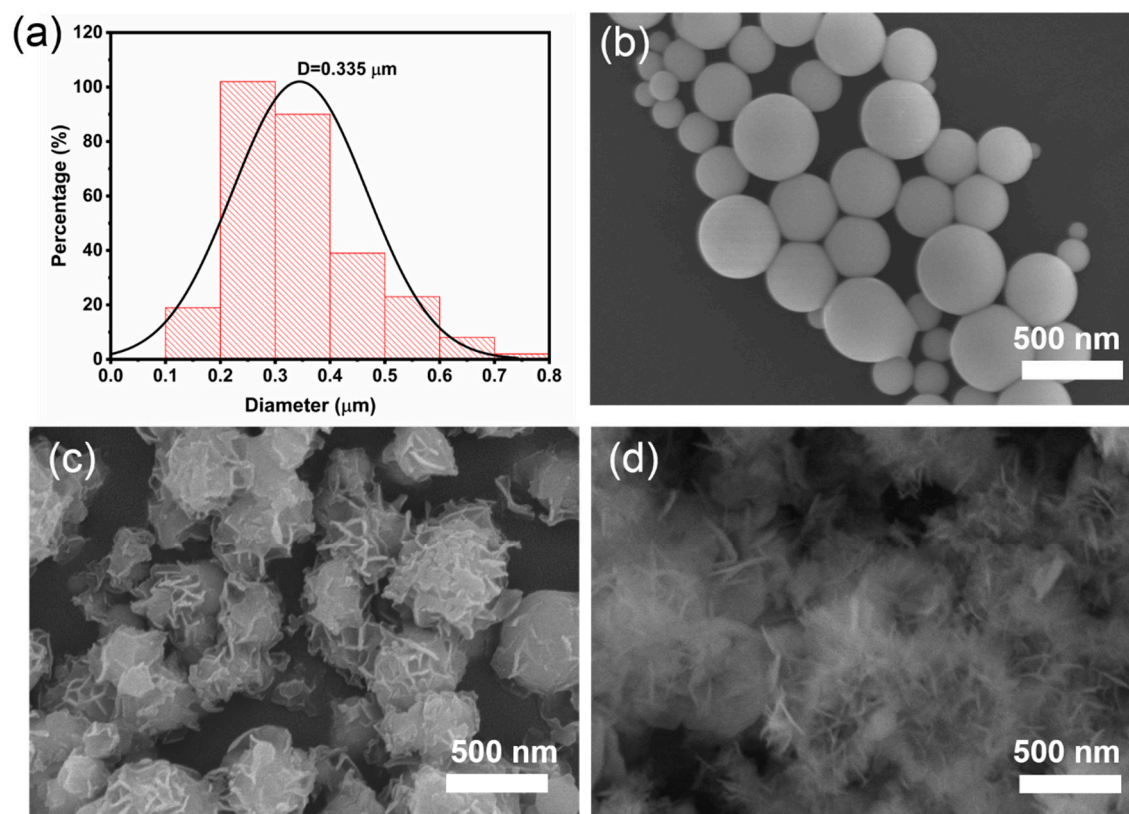

**Figure S1.** (a) The particle size distributions obtained from Figure 1; the larger magnification SEM images of (b) GaZn nanoparticles; (c) CoOOH/Ga; (d) Co(OH)<sub>2</sub>.

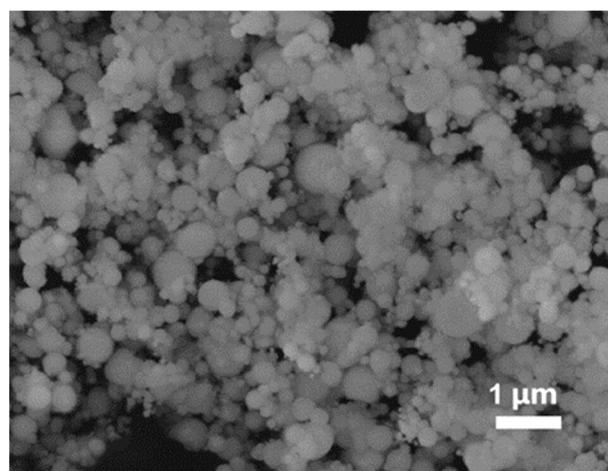

**Figure S2.** The SEM image of pure Ga nanoparticles reacting with Co solution.

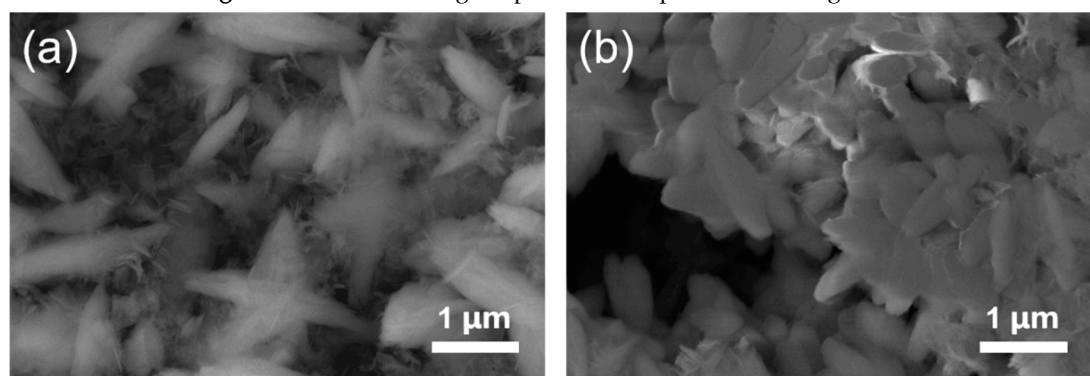

**Figure S3.** The SEM images of different quality CoOOH/Ga nanoparticles placed in ammonia solution with pH ~ 11.3 (a) Co(OH)<sub>2</sub>/Ga-40; (b) Co(OH)<sub>2</sub>/Ga-60.

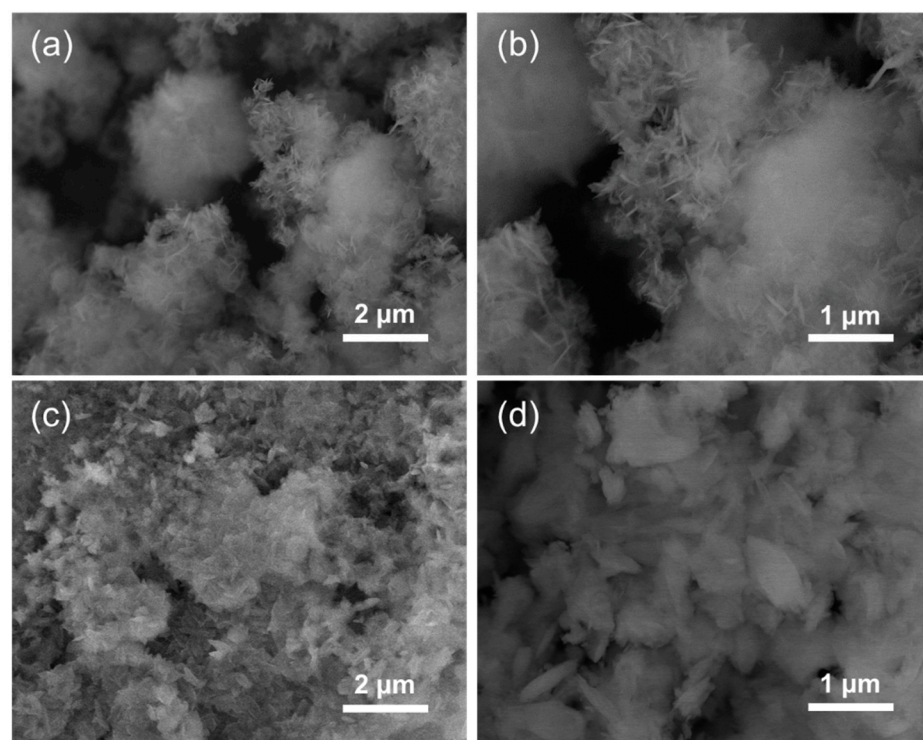

**Figure S4.** The SEM images of (a, b) the sample of CoOOH/Ga template was cleaned by ammonia solution with pH~12.3; (c, d) the samples of CoOOH/Ga were cleaned by NaOH solution with pH~11.3.

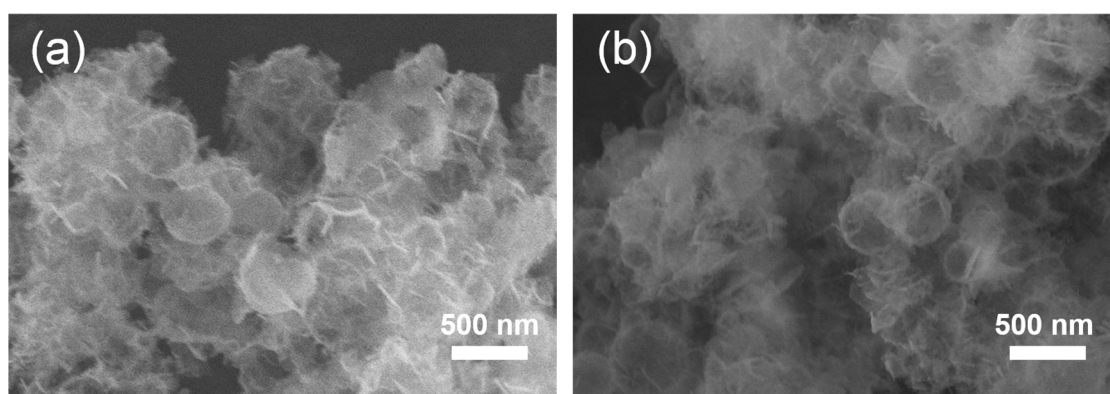

**Figure S5.** the larger magnification SEM images of (a) CoSe<sub>2</sub> and (b) CoS<sub>2</sub>.



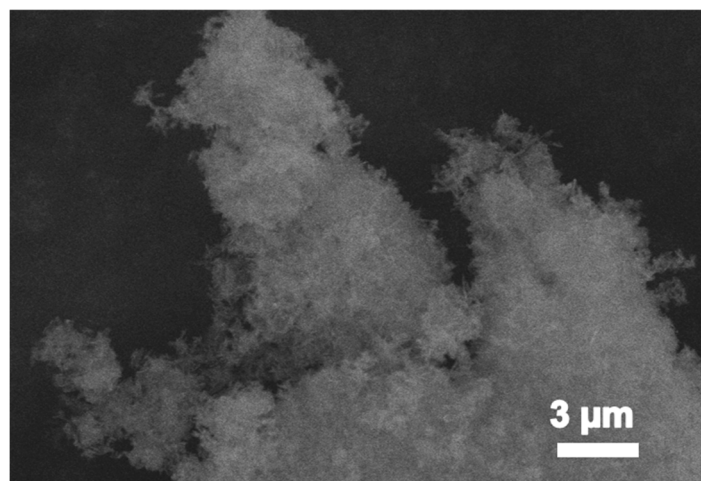

**Figure S6.** The SEM image of CoSe<sub>2</sub>-450.

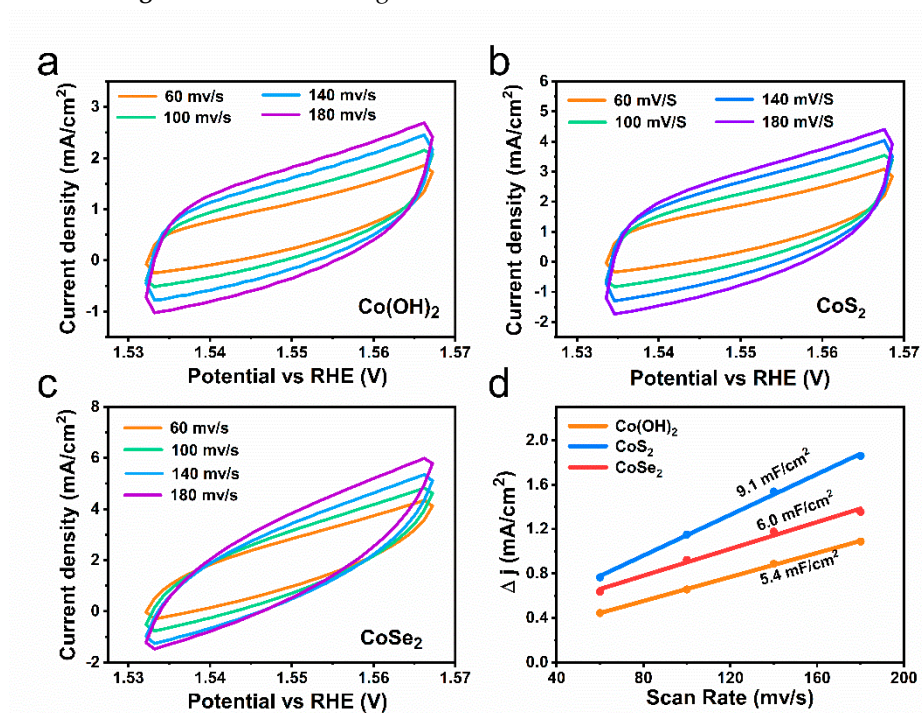

**Figure S7.** Electrochemical capacitance measurements with different scan rates from 60 to 180 mV/s in 1 M KOH solution of (a) Co(OH)<sub>2</sub>; (b) CoS<sub>2</sub>; (c) CoSe<sub>2</sub>; (d) The double layer capacitance ( $C_{dl}$ ) results for all samples.

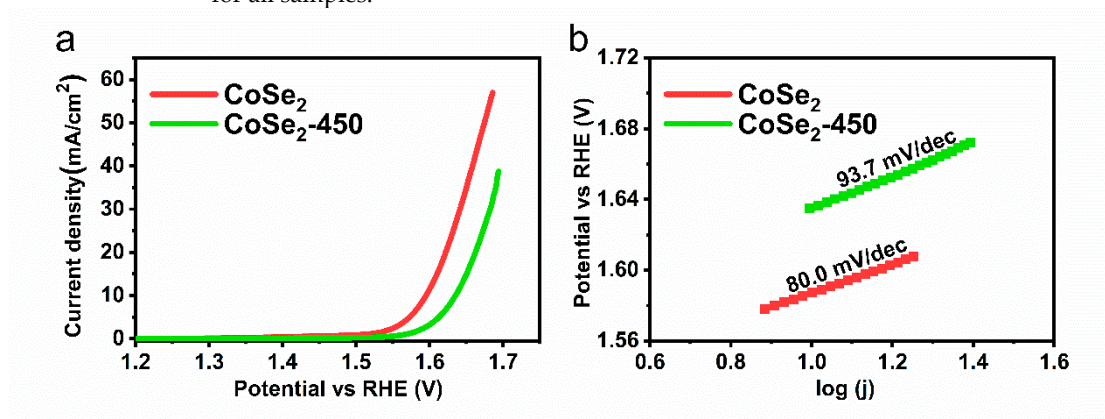

**Figure S8.** (a) The OER polarization curves and (b) Tafel plots of CoSe<sub>2</sub> and CoSe<sub>2</sub>-450.

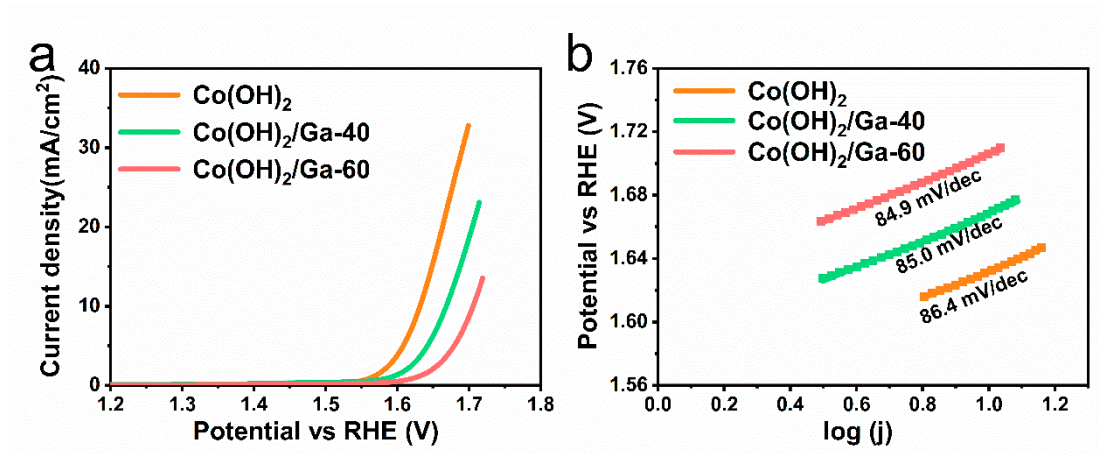

**Figure S9.** (a) The OER polarization curves and (b) Tafel plots of Co(OH)<sub>2</sub>, Co(OH)<sub>2</sub>/Ga-40 and Co(OH)<sub>2</sub>/Ga-60.
